# Supplementary material for: Crystal structures of the TRIC trimeric intracellular cation channel orthologues
Source: PubMed Central journal article supplement — Cell Res. 2016 Dec 2;26(12):1288–301. doi: 10.1038/cr.2016.140 (PMC5143425; doi:10.1038/cr.2016.140), 2016-12-02
Supplement: cr2016140x1.pdf [file cr2016140x1.pdf]

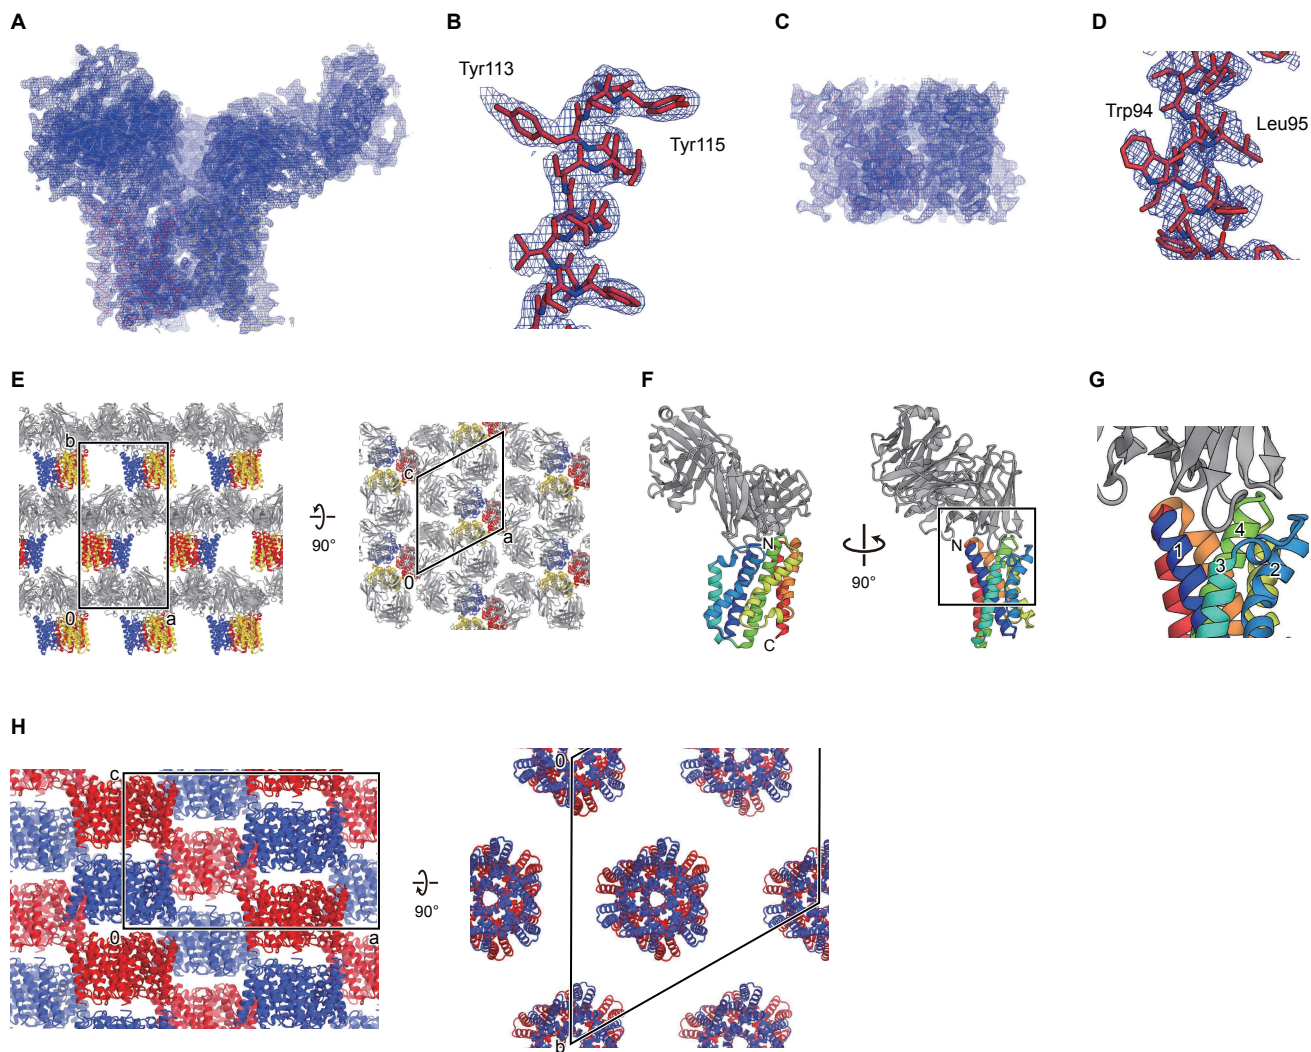

**Supplementary information, Figure S1** Representative electron density maps and crystal packings of SsTRIC and RsTRIC.

**(A, B)** The representative  $2F_o - F_c$  electron density map contoured at  $1.0 \sigma$  for the SsTRIC overall structure **(A)** and close-up view of TM4 **(B)**, shown by a stick model. **(C, D)** The representative  $2F_o - F_c$  electron density map contoured at  $1.0 \sigma$  for the RsTRIC overall structure **(C)** and close-up view of TM4 **(D)**, shown by a stick model. **(E)** The crystal packing of the SsTRIC-Fab complex, viewed down the c axis (left) and the b axis (right). SsTRIC is colored as in Figure 2A, and Fab is colored grey. **(F)** Overall structure of the monomeric SsTRIC-Fab complex. SsTRIC is colored as in Figure 2C, and Fab is colored grey. **(G)** Close-up view of the contact interface between SsTRIC and Fab, indicated in **F** with a black box. **(H)** The crystal packing of RsTRIC, viewed down the b axis (left) and the c axis (right). Each molecule in the asymmetric unit is colored differently (red and blue).
