# Supplementary material for: Crystal structures of the TRIC trimeric intracellular cation channel orthologues
Source: PubMed Central journal article supplement — Cell Res. 2016 Dec 2;26(12):1288–301. doi: 10.1038/cr.2016.140 (PMC5143425; doi:10.1038/cr.2016.140), 2016-12-02
Supplement: cr2016140x2.pdf [file cr2016140x2.pdf]

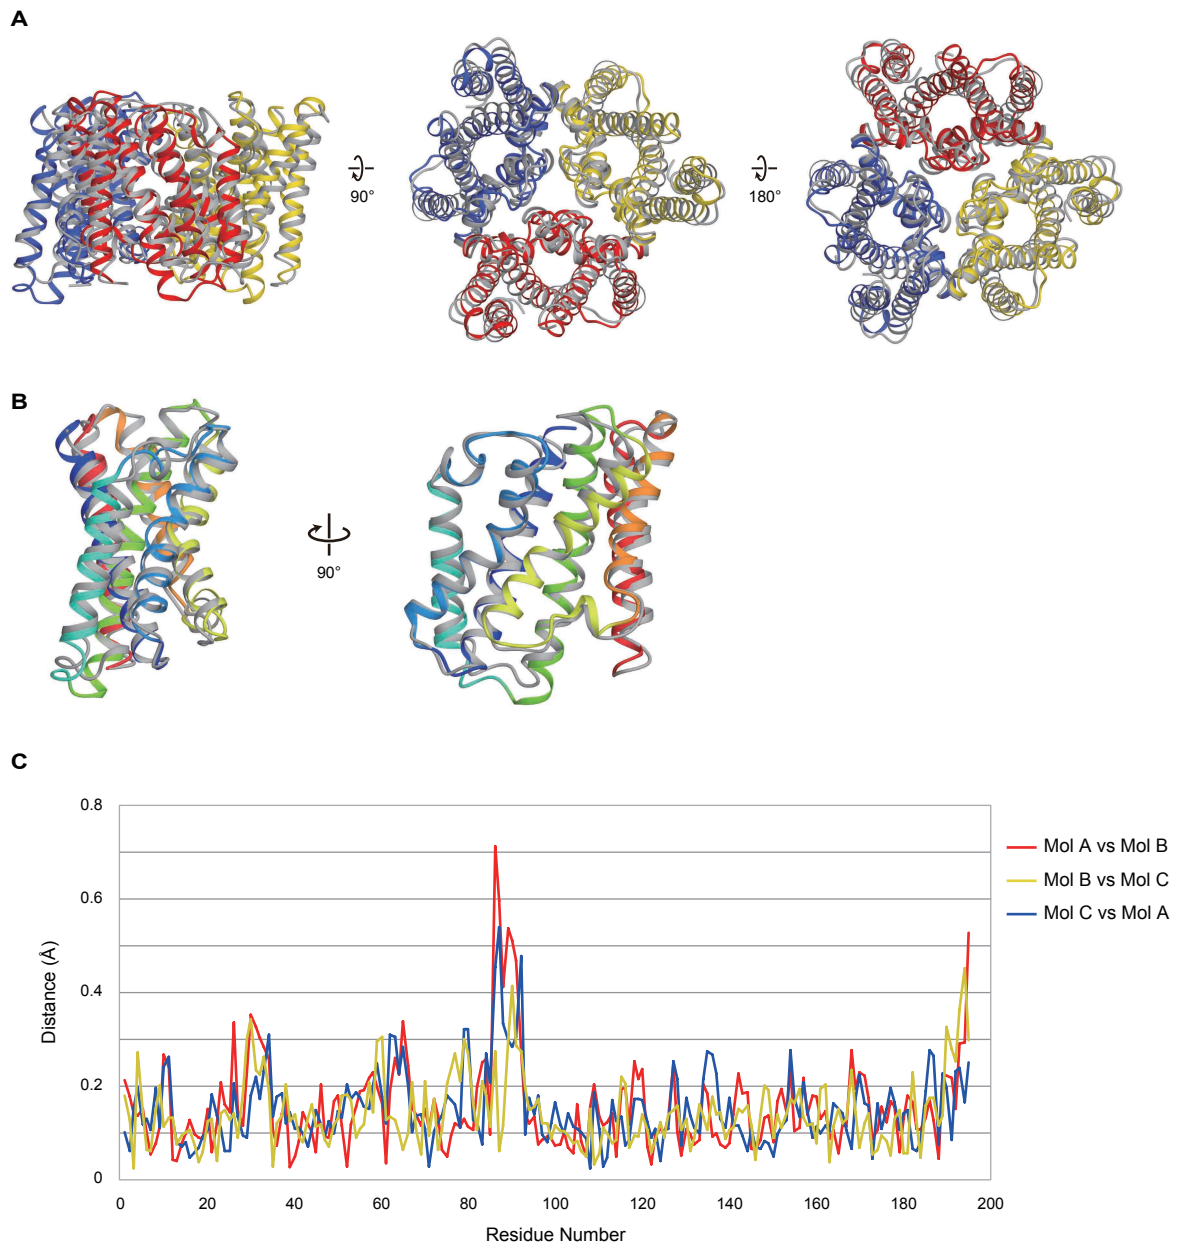

**Supplementary information, Figure S2 Superimposition of SsTRIC and RsTRIC.**

**(A)** Representative superimposition of the trimers of SsTRIC (colored) and RsTRIC (grey), viewed parallel to the membrane (left), and from the periplasmic (middle) and cytoplasmic (right) sides. The RMSD value is 2.3 Å for 549 C $\alpha$  atoms. For the calculation of trimer RMSD values, Chains C, D and E (Met 1 - Phe195) in SsTRIC and Chain A (Gln3 - Leu196) in RsTRIC were used. **(B)** Representative superimposition of the SsTRIC subunit (colored) and the RsTRIC subunit (grey), viewed parallel to the membrane. The RMSD value is 1.4 Å for 188 C $\alpha$  atoms. For the calculation of monomer RMSD values, Chain C (Met 1 - Phe195) in SsTRIC and Chain A (Gln3 - Leu196) in RsTRIC were used. **(C)** RMSD values for the C $\alpha$  atoms among the SsTRIC subunits.
