# Supplementary material for: Crystal structures of the TRIC trimeric intracellular cation channel orthologues
Source: PubMed Central journal article supplement — Cell Res. 2016 Dec 2;26(12):1288–301. doi: 10.1038/cr.2016.140 (PMC5143425; doi:10.1038/cr.2016.140), 2016-12-02
Supplement: cr2016140x7.pdf [file cr2016140x7.pdf]

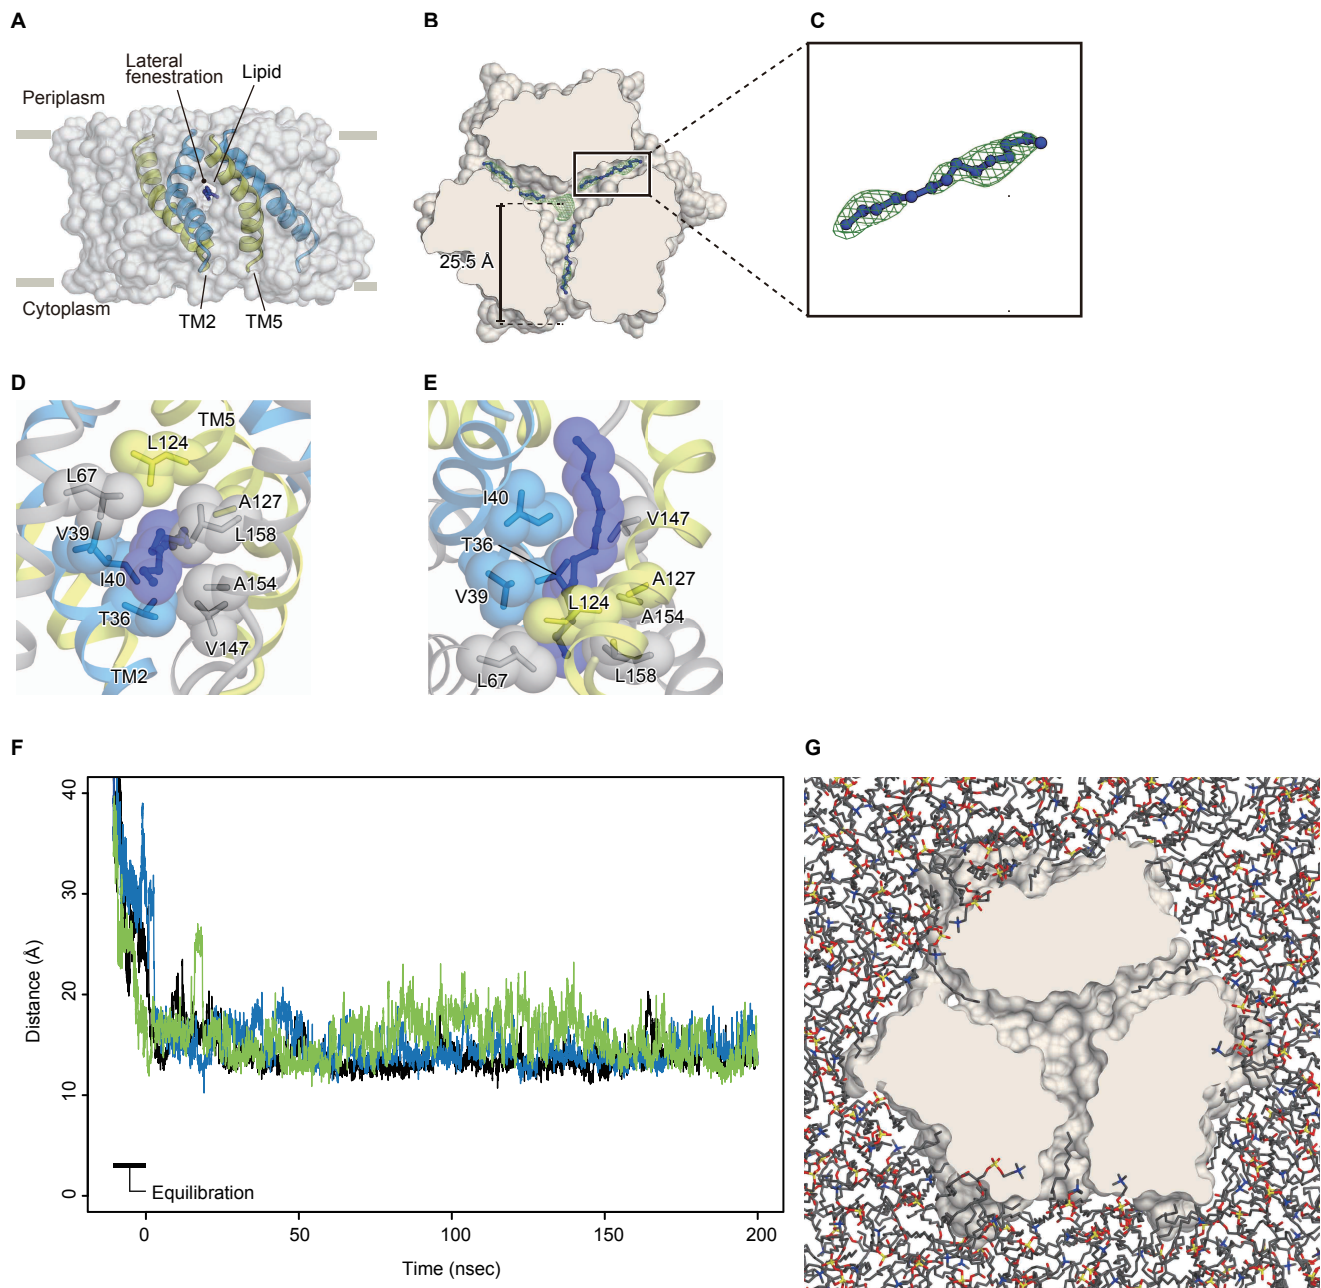

**Supplementary information, Figure S7** Molecular dynamics simulation of SsTRIC.

**(A)** Surface representation of SsTRIC. The TM2 and TM5 helices from two subunits are also shown, and colored as in Figure 5A. **(B)** Cross section of the surface representation of SsTRIC, showing the lateral fenestrations, viewed from the periplasmic side. The  $F_o - F_c$

electron density map, contoured at  $2.5 \sigma$ , is shown for the carbon acyl chains of lipid molecules. **(C)** An enlarged view of the carbon acyl chain of the lipid molecule. **(D, E)** Close-up views of the lateral fenestrations of SsTRIC. The side chains of the residues lining the fenestrations are shown by sphere and stick models. **(F)** The distance between the terminal carbon of the POPC acyl chain and the center of the protein ( $n = 3$ ). **(G)** Cross section of the surface representation from the last frame snapshot of the 200 ns simulation of trimeric SsTRIC. POPC lipid molecules are depicted by stick models.
