# Supplementary material for: Crystal structures of the TRIC trimeric intracellular cation channel orthologues
Source: PubMed Central journal article supplement — Cell Res. 2016 Dec 2;26(12):1288–301. doi: 10.1038/cr.2016.140 (PMC5143425; doi:10.1038/cr.2016.140), 2016-12-02
Supplement: cr2016140x8.pdf [file cr2016140x8.pdf]

---

**Supplementary information, Table S1** Data Collection and Refinement Statistics

---

|                                                     | SsTRIC                  | RsTRIC<br>Native         | RsTRIC<br>Se-Met      |
|-----------------------------------------------------|-------------------------|--------------------------|-----------------------|
| <b>Data collection</b>                              |                         |                          |                       |
| X-ray source                                        | SPring-8 BL41XU         | Swiss Light Source X06SA | SPring-8 BL41XU       |
| Wavelength (Å)                                      | 1.0000                  | 1.0000                   | 0.9792                |
| Space group                                         | <i>P</i> 2 <sub>1</sub> | <i>R</i> 3               | <i>R</i> 3            |
| Cell dimensions                                     |                         |                          |                       |
| <i>a, b, c</i> (Å)                                  | 102.7, 171.4, 103.3     | 156.0, 156.0, 82.4       | 156.7, 156.7, 82.5    |
| <i>α, β, γ</i> (°)                                  | 90.0, 117.9, 90.0       | 90.0, 90.0, 120.0        | 90.0, 90.0, 120.0     |
| Resolution (Å)                                      | 50.0-2.64 (2.80-2.64)   | 50.0-3.41 (3.50-3.41)    | 50.0-3.60 (3.82-3.60) |
| <i>R</i> <sub>sym</sub>                             | 0.099 (1.130)           | 0.072 (0.285)            | 0.129 (0.921)         |
| <i>I</i> / <i>σ</i> ( <i>I</i> )                    | 14.59 (1.63)            | 15.20 (6.65)             | 13.62 (3.00)          |
| Completeness (%)                                    | 98.2 (97.5)             | 95.3 (40.6)              | 99.6 (98.1)           |
| Redundancy                                          | 7.02 (6.93)             | 5.1 (4.8)                | 10.5 (10.6)           |
| CC <sub>1/2</sub>                                   | 1.000 (0.685)           | 0.996 (0.963)            | 0.999 (0.917)         |
| <b>Refinement</b>                                   |                         |                          |                       |
| Resolution (Å)                                      | 50.0-2.64               | 50.0-3.41                |                       |
| No. reflections                                     | 90876                   | 9730                     |                       |
| <i>R</i> <sub>work</sub> / <i>R</i> <sub>free</sub> | 21.1/25.2               | 24.7/27.3                |                       |
| No. atoms                                           |                         |                          |                       |
| Protein                                             | 14438                   | 2794                     |                       |
| Ligand/ion                                          | 55                      | 28                       |                       |
| Water                                               | 143                     |                          |                       |
| B-factors                                           |                         |                          |                       |
| Protein                                             | 73.3                    | 42.7                     |                       |
| Ligand/ion                                          | 67.0                    | 26.4                     |                       |
| Water                                               | 61.7                    |                          |                       |
| R.m.s. deviations                                   |                         |                          |                       |
| Bond lengths (Å)                                    | 0.011                   | 0.004                    |                       |
| Bond angles (°)                                     | 1.350                   | 0.960                    |                       |
| Ramachandran plot (%)                               |                         |                          |                       |
| Favored                                             | 97.1                    | 98.0                     |                       |
| Outliers                                            | 0.0                     | 0.0                      |                       |

---
